## History of LINE and SINE extinction

### 1 **Tracing the History of LINE and SINE Extinction in Sigmodontine Rodents**

2

3 Lei Yang<sup>1,2,3</sup> and Holly A. Wichman<sup>1,2</sup>

4 <sup>1,2</sup>Department of Biological Sciences & Institute for Bioinformatics and Evolutionary Studies,

5 University of Idaho, Moscow, Idaho, United States of America

6 <sup>3</sup>Present address: Department of Biology, Pennsylvania State University, University Park,

7 Pennsylvania, United States of America

8

9 Corresponding author: Holly A. Wichman

10

11 Email: [hwichman@uidaho.edu](mailto:hwichman@uidaho.edu)

12 Fax: +1(208)885-7905

13 Phone: +1(208)885-7805

14 Running title: History of LINE and SINE extinction

15 **Abstract**

16 **Background:** L1 retrotransposons have co-evolved with their mammalian hosts for the  
17 entire history of mammals and currently make up to 20% of a typical mammalian genome. B1  
18 retrotransposons are dependent on L1 for retrotransposition and span the evolutionary history of  
19 rodents since their radiation. L1s were found to have lost their activity in a group of South  
20 American rodents, the Sigmodontinae, and B1 inactivation preceded the extinction of L1 in the  
21 same group. Consequently, a basal group of sigmodontines have active L1s but inactive B1s and  
22 a derived clade have both inactive L1s and B1s. It has been suggested that B1s became extinct  
23 during a long period of L1 quiescence and that L1s subsequently reemerged in the basal group.

24 **Results:** Here we investigate the evolutionary histories of L1 and B1 in the sigmodontine  
25 rodents and show that L1 activity continued until after the split of the L1-extinct clade and the  
26 basal group. After the split, L1s had a small burst of activity in the former group, followed by  
27 extinction. In the basal group, activity was initially low but was followed by a dramatic increase  
28 in L1 activity. We found the last wave of B1s retrotransposition was large and probably preceded  
29 the split between the two rodent clades.

30 **Conclusions:** Given that L1s had been steadily retrotransposing during the time  
31 corresponding to B1 extinction and that the burst of B1 activity preceding B1 extinction was  
32 large, we conclude that B1 extinction was not a result of L1 quiescence. Rather, the burst of B1  
33 activity may have contributed to L1 extinction both by competition with L1 and by putting  
34 strong selective pressure on the host to control retrotransposition.

35

## 36 **Background**

37           LINEs (Long INterspersed Elements) are autonomous non-LTR (non-long terminal  
38 repeat) retrotransposons that move through an RNA intermediate. L1 (LINE-1) is the most  
39 successful family of LINEs in eutherian mammals [1] and make up ~20% of a typical  
40 mammalian genome [2, 3]. A functional full-length L1 is typically 6,000-7,000 bp long and  
41 composed of a 5' untranslated region (5'UTR) harboring an RNA polymerase II promoter, two  
42 non-overlapping open reading frames (ORFs) known as ORF1 and ORF2 and a 3'UTR followed  
43 by a poly-adenosine sequence [4]. The structure of L1 can be diverse among different mammals,  
44 particularly in the 5' UTR and ORF1 [5]. The ORF-encoded proteins are strictly required for L1  
45 retrotransposition and are highly *cis*-preferential [6, 7]. L1s are adenosine rich (~40%) on their  
46 coding strand, which results in biased codon usage compared to host genes [8, 9], elongation  
47 defects [10], and premature RNA splicing [11]. This A-richness contributes to the inefficiency of  
48 L1 retrotransposition and is proposed to regulate the genes in their vicinity [10].

49           SINEs (Short INterspersed Elements) are relatively short non-autonomous, non-LTR  
50 transposable elements. SINEs do not encode proteins for their own retrotransposition and  
51 depend on the reverse transcriptase encoded by other transposable elements such as LINEs [12,  
52 13]. Although L1s are highly *cis*-preferential [6, 7], SINEs can take advantage of L1-encoded  
53 proteins for their own retrotransposition [12-14]. Despite their short length, SINEs account for  
54 ~10% of a typical mammalian genome due to their high copy numbers [2, 3]. Among the ~70  
55 SINE families found in mammals [15], B1 is the most abundant in mouse [3] and possibly most  
56 rodent species [16], occupying ~3% of the mouse genome [3]. B1s derived from the RNA  
57 component of signal recognition particle 7SL RNA [17, 18] and share features with its ancestors  
58 – a functional B1 is ~150 bp long and transcribed by RNA polymerase III with the aid of its two

## History of LINE and SINE extinction

59 transcription factor binding boxes [19, 20]. B1 sequences are rich in CpG sites, which are  
60 methylated and thus prone to mutation in mammalian genomes [21], and the elevated mutation  
61 rate is pronounced compared to the A-rich L1s. Because the majority of new L1 and B1 inserts  
62 are neutrally-evolving pseudogenes, the CpG-rich B1 sequences decay faster than the A-rich L1  
63 sequences.

64 Both L1 and B1 have long histories of co-evolution with their host genomes. Unlike  
65 some transposable elements, there is no known targeted mechanism for L1s excision and thus  
66 L1s persist in the genome unless they are removed by non-specific mechanisms. The oldest L1s  
67 trace back to the common ancestor of placental mammals and marsupials, ~160 MYA [1, 22].  
68 L1s evolve as master lineages so that a single or a few lineages are responsible for the total  
69 retrotransposition in a short time window [23-26]. New master elements replace the old ones,  
70 eventually dominating retrotransposition, and this replacement process happens recurrently. B1s  
71 are younger than L1s, having arisen just before the divergence of the common ancestor of  
72 rodents, ~65 MYA [27], and they are specific to rodents. Other SINEs, including B2, B4 and ID  
73 elements, are also present in rodent genomes [16]. SINE families have been interacting with L1s  
74 for more than 100 MYA, and fossil remnants of extinct SINE families are detectable in well-  
75 characterized mammalian genomes [15, 28]. Despite being under strict regulation, L1 and B1  
76 make up approximately a quarter of a typical rodent genome [3]. For example, in the mouse  
77 genome, there are ~599,000 total copies of L1, responsible for ~19% of the genome [3], of which  
78 ~3,000 copies are potentially functional [29], and ~564,000 copies of B1s, responsible for ~3%  
79 of the genome [3].

80 LINES and SINEs have considerable impact on the mammalian genome, although they  
81 were traditionally viewed as “junk DNA”. As LINES and SINEs, including L1s and B1s,

## History of LINE and SINE extinction

82 retrotranspose and recombine, they introduce genome instability [30], cause disease [31] and  
83 may occasionally be co-opted by the host to serve certain functions, such as their proposed roles  
84 in neuro-plasticity [32, 33], X chromosome inactivation [34, 35], regulatory functions [36, 37],  
85 DNA break-repair [38] and genome organization [39, 40]. Due to the deleterious effects of  
86 LINES and SINES on the genome, the hosts have evolved many mechanisms to defend against  
87 them [41-45]. In addition, the fact that L1 doesn't encode all the enzymatic components required  
88 for retrotransposition could result in ongoing competition between L1s and the host for these  
89 required host factors [46, 47]. Host defense against L1s and B1s are especially strong in  
90 germline cells due to germline-specific host defense mechanisms, so that only a limited number  
91 of new copies are inserted in each generation [48, 49]. L1s and B1s are both epigenetically  
92 silenced [50, 51] and under the control of small RNAs [52], which are specifically expressed in  
93 germline cells.

94         Since L1 retrotransposition is under strict control by multiple host defenses, it might  
95 seem reasonable for the host to occasionally win the evolutionary arms race with L1s, resulting  
96 in loss of L1 activity (L1 extinction). L1s are not known to move horizontally, so such  
97 extinctions would affect all derived host species. Two factors are of note here. First, clades with  
98 early L1 extinctions could have given rise to large mammalian lineages without L1 activity and  
99 be easily detected because of both the number of species affected and the deterioration of the  
100 remnant sequences in the genome. Secondly, recent extinctions will be difficult to differentiate  
101 from periods of L1 quiescence. To clarify the terms related to loss of L1 activity in this work,  
102 we refer to a period of low L1 activity as “quiescence” and complete loss of L1 activity as  
103 “extinction”. Given the large phylogenetic impact of early extinctions, one might expect L1s to  
104 eventually become extinct in most mammalian genomes, and yet L1s have persisted throughout

## History of LINE and SINE extinction

105 the entire evolutionary history of their placental mammal and marsupial hosts. Thus, either most  
106 L1 extinctions are either recent or rare, or mammalian lineages subject to ancient L1 extinctions  
107 do not persist or they give rise to few new species. Understanding the dynamics of L1 extinction  
108 will be as important as understanding the dynamics of L1 activity in sorting out the impact of  
109 L1s on mammalian genome evolution.

110 Several cases of L1 extinction have been proposed in the literature [53-61] and two of  
111 these are deep extinction events that cover major groups of mammals [53-57]. One of the major  
112 L1 extinctions [55-57] occurred in a large group of South American rodents and includes most  
113 species in Sigmodontinae. Sigmodontinae is a subfamily of the Cricetidae family, including  
114 approximately 377 species classified into 74 genera in nine tribes (Figure 1) [62] and thus  
115 contains to 7-8% of the estimated 5,000 mammalian species [63]. Given that B1  
116 retrotransposition is dependent on that of L1, it is expected that B1s should lose their activity  
117 simultaneously with L1s. However, the B1 extinction in Sigmodontinae appears to have  
118 preceded that of L1s based on samples from 14 genera in five tribes [55-57], where the basal  
119 genus *Sigmodon* carries inactive B1 and active L1, and the descendant genera carry both inactive  
120 L1 and B1 (Figure 1). It has also been shown that loss of L1 and B1 activity follows the  
121 expansion of a group of endogenous retrovirus [64, 65].

122 It was previously hypothesized by Cordaux and Batzer that the L1 can experience long-  
123 term quiescence as a “stealth driver” [66], and B1 extinction could have happened during this  
124 period of L1 quiescence [57]. Since B1s are more prone to mutations than the average sequence  
125 due to enriched CpG content, Rinehart *et al.* [57] hypothesized that B1 was unable to  
126 retrotranspose at a high enough rate during L1 quiescence to replace their active copies,  
127 accumulating debilitating mutations more rapidly [21] than L1s. When a more active family of

## History of LINE and SINE extinction

128 L1 emerged in the Sigmodontini, B1 was too degenerated to retrotranspose, resulting in B1  
129 extinction even in the presence of high L1 activity.

130 In this study, we investigate the evolution histories of L1 and B1 spanning the time of  
131 their extinctions and the radiation of the extant species in Sigmodontinae (Figure 1). Since the  
132 group carrying extinct L1s and B1s (*Oryzomyalia*, Figure 1) shares a common ancestor, we used  
133 the marsh rice rat *Oryzomys palustris* to represent this group, hereafter referred to as the “L1-  
134 extinct clade”. We used the hispid cotton rat *Sigmodon hispidus* to represent the clade carrying  
135 active L1 but inactive B1, hereafter referred to as the “basal group”. We used the deer mouse  
136 *Peromyscus maniculatus* to represent a closely related clade carrying both active L1 and B1,  
137 hereafter referred to as the “outgroup”.

138 Using genome trace files from the species representing the L1-extinct clade and the basal  
139 group, we show that the activity of L1 and B1 families that precede the divergence of the clades  
140 is comparable in the current genomes of the two groups. L1 families had been steadily replaced  
141 before the split of the two groups and maintained activity after the split of the basal group and  
142 the L1-extinct clade. Shortly after this split L1 activity ceased in the L1-extinct clade but  
143 became highly active in the basal group. B1s, on the other hand, had a very large increase in  
144 activity prior to the split between the L1-extinct clade and the basal group, and there is no strong  
145 evidence of activity in the two groups following their divergence. The large burst of B1 activity  
146 just prior to extinction suggests that L1 quiescence is unlikely responsible for B1 extinction. The  
147 last wave of B1 retrotransposition is the largest detectable in the B1 evolutionary history of the  
148 group, suggesting B1s’ strong competition with L1s or enhanced host defense triggered by  
149 radical B1 expansion might have contributed to the extinction of L1.

150

151 **Results**

152 To investigate the history of L1 retrotransposition in *O. palustris* and *S. hispidus*, we used  
153 COSEG [67] to identify closely related L1 groups based on shared, co-segregating sites as  
154 described in Methods. We follow the convention of COSEG to designate these groups as  
155 *subfamilies*. RepeatMasker [67] was used to initially assign genomic L1 copies to subfamilies,  
156 and seven subfamilies with no assigned sequences were removed from further consideration,  
157 leaving 47 subfamilies for further analysis.

158 To examine the activity of L1s in *O. palustris* and *S. hispidus*, we searched the trace files  
159 of both genomes separately with the consensus sequences of the abovementioned 47 subfamilies  
160 and identified 19,254 sequences in *O. palustris* and 90,526 in *S. hispidus*. The age of each  
161 sequence was approximated by its percent divergence from the corresponding subfamily  
162 consensus – the higher the percent divergence, the older the sequence. The peak of the  
163 distribution was used as an approximation of the age of the subfamily (Table S1). Given the  
164 possible changes of evolution rate in the detectable range of L1 evolutionary, a global conversion  
165 from percent divergence to time is challenging. However, because of the shared evolutionary  
166 history of *O. palustris* and *S. hispidus*, percent divergence is a reasonably good marker to  
167 compare the age of L1 subfamilies of the two species.

168 Subfamily consensus sequences were also subjected to phylogenetic analysis (Figure S1).  
169 Subsequently, phylogenetic relationships and sequence similarities between subfamilies were  
170 used to assign subfamilies to families with the stipulation that the pairwise distance between  
171 subfamilies within a family be no greater than 3.5%. This distance was determined operationally  
172 based on the divergences among phylogenetically clustered subfamilies. Clusters of subfamilies  
173 that were similar at the sequence level but differed in age were assigned to different families.



## History of LINE and SINE extinction

174 This process identified five families specific to *S. hispidus* (S1 to S5), four families shared by *O.*  
175 *palustris* and *S. hispidus* (OS1 to OS4) and two shared by *P. maniculatus*, *O. palustris* and *S.*  
176 *hispidus* (OSP1 and OSP2, Table S1). A distance-based phylogeny reflecting the relationship  
177 between L1 families is presented in Figure 2A. Individual sequences were assigned to the  
178 families to which their subfamilies belong; the age distribution within a family is based on the  
179 distance of each sequence from its subfamily consensus (Figure 3).

180 As expected, sequences from L1 families shared by *O. palustris* and *S. hispidus* are  
181 present in both genomes, and these shared families are fairly synchronized in time and  
182 comparable in copy number (Figure 3A). The *Sigmodon*-specific L1 families (Figure 3B,  
183 families S1-5) experienced substantial amplification after divergence from the L1-extinct clade,  
184 whereas no *Oryzomys*-specific subfamilies were identified by COSEG. The *Sigmodon*-specific  
185 subfamilies had a few sequences from the *O. palustris* genome assigned to them, but these  
186 assignments appear to be anomalous since the sequences are highly divergent from the subfamily  
187 consensus sequences (Table S1). Family OS1, the youngest shared family is of special interest.  
188 Family OS1 corresponds to a single L1 subfamily, suggesting that there was little divergence of  
189 L1s within the family. It is the last active family prior to the L1 extinction and has ~1.5-fold  
190 higher copy numbers per Gbp of sequence in *O. palustris* than in *S. hispidus*. This difference in  
191 L1 deposition between *O. palustris* and *S. hispidus* suggests that L1s remained active in the L1-  
192 extinct clade after the separation of that group from the basal group. Furthermore, L1s were  
193 more active in the lineage leading to *Oryzomyia*, in which L1s eventually became extinct, than  
194 in the lineage leading to *Sigmodontini*. A direct comparison of the activity of the L1 families  
195 directly preceding this split (OS2), directly following the split (OS1) and at the base of the  
196 *Sigmodontini* (S5) is presented in Figure 4A. Thus, L1 experienced an expansion (family OS1)

## History of LINE and SINE extinction

197 in the lineage leading to *Oryzomyia* immediately before L1 extinction, while the lineage  
198 leading to Sigmodontini experienced a delayed but much larger L1 expansion.

199 In order to study the B1 dynamics in sigmodontine rodents, we performed the analysis on  
200 B1 similar to that done on L1. Because of the short length and CpG-rich nature of B1, we  
201 required twice as many sequences to form a subfamily in the second round COSEG as described  
202 in Methods. The analysis revealed 30 subfamilies and five families of B1 in both species (Table  
203 S2). A distance-based phylogeny reflecting the relationships between B1 families is presented in  
204 Figure 2B. One of the families (OS1) is shared by *O. palustris* and *S. hispidus* and the other four  
205 (families OSP1-5) are shared by *O. palustris*, *S. hispidus* and *P. maniculatus*. All of the B1  
206 families are shared by *O. palustris* and *S. hispidus* and the representation of these families in  
207 both genomes is fairly synchronized in time and comparable in copy number (Figure 5). Since  
208 the outgroup, represented by *P. maniculatus*, carries both active L1s and B1s, we know that B1  
209 extinction happened after the split of the outgroup, yet the point at which B1 lost activity in the  
210 basal group is to be determined. Here we show that the peak of the most recent B1 family  
211 resides at ~11.3% in *O. palustris* and ~10.7% in *S. hispidus* (Table S2). These peaks reside in  
212 the same time window as L1 family OS2 (~11.1% in *O. palustris* and ~10.3% in *S. hispidus*,  
213 Table S1), suggesting that B1 family OS1 is coincident in time with L1 family OS2. Since L1  
214 family OS2 is the youngest L1 family prior to the separation of the basal group and the L1-  
215 extinct clade, the last wave of B1 retrotransposition likely preceded the extinction of L1.

216

## 217 Discussion

218 In this paper we explore the tempo of L1 and B1 activity surrounding the extinction of  
219 both elements that occurred in most species within the rodent subfamily Sigmodontinae. This

## History of LINE and SINE extinction

220 work is made possible by sequencing methods that allow us to gather large amounts of sequence  
221 data and by the availability of a robust species phylogeny for the group (Figure 1). A recent  
222 phylogenetic analysis of muroid rodents [68] indicates that the tribe Sigmodontini is basal to the  
223 group and sister to the tribe Ichthyomyini. These two tribes are sister to a large, polytomic group  
224 (the Oryzomyalia) which includes the remaining five tribes; this group is the result of a rapid  
225 radiation of rodents into South America about 5 MYA [69]. Previous work indicated that L1s  
226 are extinct in the Oryzomyalia but active in the Sigmodontini, which includes one genus,  
227 *Sigmodon*, with 14 species. L1 extinction in the Oryzomyalia has been documented in 14 genera  
228 distributed across four tribes spanning this group (Figure 1) [56]. B1s are extinct in Oryzomyalia  
229 and Sigmodontini, but the status of both L1s and B1 in the intermediate tribe, Ichthyomyini, is  
230 unknown. Thus, L1 extinction from this single event likely affects between 345 and 362 species,  
231 or about 7% of all mammalian species.

232 We reconstructed the shared evolutionary history of L1s and B1s in Sigmodontinae in the  
233 period preceding and following extinction of these elements. Our results suggest that L1 master  
234 elements have been replaced steadily prior to the extinction of both L1 and B1. This is reflected  
235 by the consecutive series of L1 families shared by *O. palustris* and *S. hispidus* after their  
236 divergence from *Peromyscus*. B1 elements did not appear to take advantage of every wave of L1  
237 activity, but a wave of L1 retrotransposition (family L1-OS2) corresponds to the B1  
238 retrotransposition peak just prior to B1 extinction (B1-OS1).

239 There is reasonably strong evidence that L1 extinction occurred after the split between  
240 the L1-extinct clade and the basal group. A summary diagram showing the higher level of OS1  
241 activity in *O. palustris* compared to *S. hispidus* (Figure 4A) suggests that the events leading to  
242 L1 extinction also happened after the split, rather than that a recovery occurred in *S. hispidus* as

## History of LINE and SINE extinction

243 has been previously suggested [56]. The evolutionary history of B1 in *O. palustris* and *S.*  
244 *hispidus* is comparable. New B1 deposition into the genome was low except for the period  
245 directly preceding B1 extinction (Figures 4B and 5). Given the short length of B1s, it is more  
246 difficult to identify subfamily clusters, so our estimation of the timing of B1 extinction is weaker  
247 than for L1. However, two lines of evidence suggest that the last burst of B1 activity occurred  
248 prior to the split between the L1-extinct and basal groups. First, the peak activity of B1OSP1  
249 corresponds most closely to the peak activity of L1OS2, which appears to precede the split of  
250 these two rodent clades. Secondly, there is no indication of large differences of activity for any  
251 of the B1 subfamilies, as was the case for L1. We suggest that finding the status of both L1s  
252 and B1s in the Ichthyomyini lineage might be critical to resolving the timing of B1 extinction.

253         The most challenging part of studying transposable element evolution history in rodents  
254 is the limitation of time windows reflected by detectable sequences. The sequences detectable  
255 by RepeatMasker decrease drastically beyond 40% divergence. Since the mutation rate in the  
256 rodent lineage is one of the highest in all mammals, 40% divergence in L1 and B1 traces back to  
257 the common ancestor of sigmodontine rodents and *P. maniculatus*, while similar studies on bats  
258 [54] and primates [70, 71] trace back to the common ancestor of mammals. Fortunately, *P.*  
259 *maniculatus* carries both active L1s and B1s and is close enough to serve as an outgroup in this  
260 study. We were able to identify an L1 family shared by *O. palustris*, *S. hispidus* and *P.*  
261 *maniculatus*, family OSP1.

262         However, there is an advantage of studying rodents in this type of evolutionary study.  
263 Since the mutation rate in the rodent lineage is higher than that of primates and bats due to  
264 shorter generation time, evolution in L1 and B1 families reflected by a given span of divergence  
265 covers a wider window of time compared to more slowly evolving species. This gives the age

## History of LINE and SINE extinction

266 distributions of L1s and B1s higher resolution and allows us to discern subtle differences  
267 between subfamily ages.

268         This study is fully bioinformatics-based, but several points are important if one is to  
269 consider the underlying molecular events relevant to transpositional bursts and extinctions. L1  
270 and B1 retrotransposition is regulated by a plethora of cellular factors [41-43, 52] and reliant on  
271 others [46, 47]. For evolutionary studies, especially the ones related to L1 and B1 extinction, the  
272 historical state of host cellular factors could dramatically change the retrotransposition  
273 landscape. Given that not all cellular factors that affect L1 and B1 retrotransposition are known  
274 and that coevolution between the elements and these cellular factors is expected, it is not  
275 currently possible to fully deduce the molecular events surrounding L1 extinction. However,  
276 from an evolutionary perspective, fixed retrotransposition events are recorded in the genome and  
277 evolve neutrally as pseudogenes unless excised or too old to be recognized. Therefore, the fossil  
278 record of L1s and B1s in the genome is a good temporal record of retrotransposition over time.  
279 However, one should keep in mind that estimation of retrotransposition rate based on historical  
280 L1 copy numbers could be affected by the excision rate of the host genome. It has been shown  
281 that the mammalian genomes have been constantly expelling sequences by various mechanisms  
282 and the excision rate varies in different clades of mammals [72]. As old insertions are not  
283 actively making new copies, they are exposed to the excision mechanisms for longer time, thus  
284 fewer copies of the older families are represented on the histogram. Old L1 and B1 copies also  
285 suffer from the recognition limitation of alignment algorithms. Detectable L1 and B1 copies are  
286 drastically reduced beyond 40% divergence.

287

288 **Methods**

## History of LINE and SINE extinction

289 *O. palustris* and *S. hispidus* genomic DNA was sequenced in two separate batches using  
290 MiSeq (Illumina, Inc., San Diego, CA) at the IBEST Genomic Resources Core (University of  
291 Idaho, Moscow, ID). Paired-end libraries were generated with an insert size of 450-550 bp; ~13  
292 and 14 million total reads were generated for *O. palustris* and *S. hispidus*, respectively.  
293 Sequences were processed with SeqyClean (<https://bitbucket.org/izhbannikov/seqyclean>) and the  
294 paired-ends were joined with FLASH [73]. Genome coverage was equivalent to approximately  
295 1.5X; 5.47 Gbp of sequence were generated for *O. palustris* and 6.06 Gbp for *S. hispidus*, but we  
296 note that genome size within the sigmodontine rodents varies. Although the genome size of *O.*  
297 *palustris* is not documented to our knowledge, the genome size of sister species in *Oryzomys*  
298 suggests that *Sigmodon* genomes are 11-16% larger than those of *Oryzomys* [74].

299 L1 reconstruction for both species was generated based on partial genomic sequences  
300 generated by 454 Pyrosequencing (Roche Applied Science, Penzberg, Germany) at the IBEST  
301 Genomic Resources Core, 203 Mbp of sequence for *O. palustris* and 214 Mbp for *S. hispidus*. *P.*  
302 *maniculatus* genome trace files were obtained from NCBI. Reconstruction of the 3' ends of *O.*  
303 *palustris* and *S. hispidus* L1s started with a 575 bp consensus seed in the 3' half of L1 ORF2  
304 generated following Cantrell *et al.* [75]. A bioinformatic pipeline for reconstructing a full length  
305 L1 is described by Yang *et al.* [54]. Briefly, sequences were acquired from the genome trace  
306 files based on percent identity. The overhangs of the found sequences allowed the creation of  
307 new seeds at both ends of the L1 fragment and were used to initiate another round of query. In  
308 this case, the reconstruction walk was repeated in the 3' direction until the 3' end of ORF2 was  
309 reached. Percent identity cutoff was set at 92% for *O. palustris* and higher percent identity (97  
310 to 99%) was used for *S. hispidus* to assure a satisfactory consensus for each walk and the

## History of LINE and SINE extinction

311 exclusion of older L1 elements. The 3' 300 bp of the reconstructed L1s were then used as the  
312 reference sequences for COSEG analysis described below.

313 B1 sequences from Rinehart *et al.* [57] were used as starting seeds for B1 analysis. The  
314 PCR-amplified B1s from *O. palustris* and *S. hispidus* were aligned with Lasergene MegAlign  
315 (DNASTAR, Madison, WI) and the consensus sequence (146 bp) was used as the reference  
316 sequence for COSEG analysis.

317 L1 and B1 subfamilies in *O. palustris* and *S. hispidus* were identified and characterized in  
318 similar fashion as described below and are summarized in Table S1 and S2.

319 The reconstructed 300 bp sequences from the 3' end of *O. palustris* and *S. hispidus* L1  
320 ORF2 were each used as the initial L1 query sequences, and the full length B1 consensus from  
321 each species, based on Rinehart *et al.* [57], were used as the initial B1 query sequences. *O.*  
322 *palustris* and *S. hispidus* MiSeq genomic DNA libraries were queried to identify homologous  
323 sequences using RepeatMasker [67] with default parameters. Hits from each search were filtered  
324 for >90% coverage of the query sequence and subsequently used for the first COSEG [67]  
325 (<http://www.repeatmasker.org/COSEGDownload.html>) run to identify subfamilies base on  
326 shared, co-segregating sequence variants. All COSEG runs were conducted under default  
327 parameter except as noted. Parameters were set such that at least 250 sequences were required to  
328 form an L1 subfamily and 1,000 were required to form a B1 subfamily. In order to identify older  
329 subfamilies, the consensus sequences of the subfamilies identified by the first COSEG run were  
330 used as queries to again search the *O. palustris* and *S. hispidus* MiSeq libraries using  
331 RepeatMasker. The identified sequences from the second RepeatMasker run were filtered for  
332 >90% coverage and extracted. *O. palustris* and *S. hispidus* sequences are combined and a second  
333 COSEG run was carried out on the combined sequences. To avoid the possible formation of

## History of LINE and SINE extinction

334 random subfamilies due to the short length of B1 and the high copy number of the detected  
335 sequences, the sequences required to form a subfamily was increased from 1,000 (for the former  
336 separate run) to 2,000, whereas this number for L1 remained unchanged at 250. The consensus  
337 sequences of the resulting COSEG subfamilies were trimmed to exclude ends that were not  
338 common to all subfamilies and the CpG sites were removed and, thus, treated as gaps by  
339 RepeatMasker and not counted for the divergence calculation. These modified subfamily  
340 consensus sequences were used for a final query of the individual *O. palustris* and *S. hispidus*  
341 MiSeq libraries using RepeatMasker. Sequences from this third run were assigned to subfamilies  
342 based on percent divergence and this information was stored for further analysis.

343 *P. maniculatus* genome trace files were data-mined in a similar fashion through a single  
344 round of RepeatMasker and COSEG. The *O. palustris* L1 and B1 sequences described above  
345 were used as the initial query seeds for this run. Selected *P. maniculatus* subfamilies were used  
346 to demarcate the ages of the subfamilies identified in the *O. palustris* and *S. hispidus* genomes  
347 (Figure 3).

348 Subfamily consensus sequences generated by the second COSEG run of the *O. palustris*  
349 and *S. hispidus* libraries were combined and aligned with MegAlign using the Clustal W method  
350 for L1 or Clustal V method for B1 and a distance matrix was calculated based on the alignment.  
351 Based on the alignment, a maximum likelihood tree was constructed using PhyML [76] with the  
352 GTR+I+G model and 100 bootstrap replicates (Figure S1). L1 and B1 sequences were then  
353 assigned to families based on the topology of the tree and a no more than 3.5% within-family  
354 pairwise distance from their subfamily consensus for L1 and 4.4% for B1. Given that the L1  
355 and B1 masters are constantly being replaced during evolution, perfect designation of large  
356 families is not possible. The 3.5% threshold was chosen so as to cluster closely related



## History of LINE and SINE extinction

357 subfamilies without inflating the number of families. Families are named according to their  
358 species-specificity and age: “S” indicates *Sigmodon*-specific families, “OS” for families shared  
359 by *Sigmodon* and *Oryzomys* and “OSP” for families shared by *Sigmodon*, *Oryzomys* and  
360 *Peromyscus*; numbers in family names indicates the age of a family within the family group with  
361 “1” being the youngest. Histograms of L1 and B1 age distributions were generated by R [77]  
362 histogram function using a window size of 1% (Figure 3). Percent divergence corresponding to  
363 retrotransposition peaks of individual families and subfamilies were determined by R using the  
364 kernel smoothing function with 0.4% bandwidth (Table S1 and S2).

365

### 366 **Availability of supporting data**

367 All data generated or analyzed during this study are included in this published article and  
368 its supplementary information files.

369

### 370 **List of abbreviations**

371 LINE: Long Interspersed Element

372 SINE: Short Interspersed Element

373 MYA: Million Years Ago

374 ORF: Open Reading Frame

375 *O. palustris*: *Oryzomys palustris*

376 *S. hispidus*: *Sigmodon hispidus*

377 *P. maniculatus*: *Peromyscus maniculatus*

378

### 379 **Competing interests**

380 The authors claim no competing interests.

381

### 382 **Author's contributions**

383 LY and HAW perceived and designed the experiment, analyzed the data and wrote the  
384 manuscript. LY prepared the DNA library for high-throughput sequencing and performed the  
385 bioinformatics analysis.

386

### 387 **Acknowledgements**

388 We thank LuAnn Scott for helpful discussions, editing and proofreading of the  
389 manuscript. We thank Dr. Jerzy Jurka at the Genetic Information Research Institute for offering  
390 the bioinformatics training. We thank John Brunsfeld and Dr. Celeste Brown on helpful ideas of  
391 the L1 reconstruction pipeline design. We thank Drs. Wenfeng An, Celeste Brown and James  
392 Foster for helpful comments and discussions. We thank the IBEST Genomics Resources Core  
393 for helping us to generate the high-throughput sequencing data used and the IBEST Computer  
394 Resources Core for hosting the clusters used for the bioinformatics analysis. This work was  
395 funded by National Institute of Health R01-GM38737 to HW and National Science Foundation  
396 DDIG-1210694 to HW and LY; analytical resources were provided by National Institute of  
397 Health GM103324 and GM103408. The funder had no role in study design, data collection and  
398 analysis, decision to publish, or preparation of the manuscript.

399

### 400 **References**

401 1. Smit AF: **The origin of interspersed repeats in the human genome.** *Curr Opin Genet*  
402 *Dev* 1996, **6**(6):743-748.

## History of LINE and SINE extinction

- 403 2. Lander ES, Linton LM, Birren B, Nusbaum C, Zody MC, Baldwin J, Devon K, Dewar K,  
404 Doyle M, FitzHugh W *et al*: **Initial sequencing and analysis of the human genome.**  
405 *Nature* 2001, **409**(6822):860-921.
- 406 3. Mouse Genome Sequencing C, Waterston RH, Lindblad-Toh K, Birney E, Rogers J,  
407 Abril JF, Agarwal P, Agarwala R, Ainscough R, Alexandersson M *et al*: **Initial**  
408 **sequencing and comparative analysis of the mouse genome.** *Nature* 2002,  
409 **420**(6915):520-562.
- 410 4. Furano AV: **The biological properties and evolutionary dynamics of mammalian**  
411 **LINE-1 retrotransposons.** *Progress in nucleic acid research and molecular biology*  
412 2000, **64**:255-294.
- 413 5. Boissinot S, Sookdeo A: **The Evolution of LINE-1 in Vertebrates.** *Genome Biol Evol*  
414 2016, **8**(12):3485-3507.
- 415 6. Wei W, Gilbert N, Ooi SL, Lawler JF, Ostertag EM, Kazazian HH, Boeke JD, Moran JV:  
416 **Human L1 retrotransposition: cis preference versus trans complementation.**  
417 *Molecular and cellular biology* 2001, **21**(4):1429-1439.
- 418 7. Kulpa DA, Moran JV: **Cis-preferential LINE-1 reverse transcriptase activity in**  
419 **ribonucleoprotein particles.** *Nat Struct Mol Biol* 2006, **13**(7):655-660.
- 420 8. Han JS, Boeke JD: **A highly active synthetic mammalian retrotransposon.** *Nature*  
421 2004, **429**(6989):314-318.
- 422 9. An W, Dai L, Niewiadowska AM, Yetil A, O'Donnell KA, Han JS, Boeke JD:  
423 **Characterization of a synthetic human LINE-1 retrotransposon ORFeus-Hs.** *Mob*  
424 *DNA* 2011, **2**(1):2.

- 425 10. Han JS, Szak ST, Boeke JD: **Transcriptional disruption by the L1 retrotransposon**  
426 **and implications for mammalian transcriptomes.** *Nature* 2004, **429**(6989):268-274.
- 427 11. Belancio VP, Hedges DJ, Deininger P: **LINE-1 RNA splicing and influences on**  
428 **mammalian gene expression.** *Nucleic acids research* 2006, **34**(5):1512-1521.
- 429 12. Dewannieux M, Esnault C, Heidmann T: **LINE-mediated retrotransposition of**  
430 **marked Alu sequences.** *Nature genetics* 2003, **35**(1):41-48.
- 431 13. Dewannieux M, Heidmann T: **L1-mediated retrotransposition of murine B1 and B2**  
432 **SINEs recapitulated in cultured cells.** *Journal of molecular biology* 2005, **349**(2):241-  
433 247.
- 434 14. Wallace N, Wagstaff BJ, Deininger PL, Roy-Engel AM: **LINE-1 ORF1 protein**  
435 **enhances Alu SINE retrotransposition.** *Gene* 2008, **419**(1-2):1-6.
- 436 15. Vassetzky NS, Kramerov DA: **SINEBase: a database and tool for SINE analysis.**  
437 *Nucleic acids research* 2013, **41**(Database issue):D83-89.
- 438 16. Deininger PL, Tiedge H, Kim J, Brosius J: **Evolution, expression, and possible**  
439 **function of a master gene for amplification of an interspersed repeated DNA family**  
440 **in rodents.** *Progress in nucleic acid research and molecular biology* 1996, **52**:67-88.
- 441 17. Weiner AM: **An abundant cytoplasmic 7S RNA is complementary to the dominant**  
442 **interspersed middle repetitive DNA sequence family in the human genome.** *Cell*  
443 1980, **22**(1 Pt 1):209-218.
- 444 18. Ullu E, Tschudi C: **Alu sequences are processed 7SL RNA genes.** *Nature* 1984,  
445 **312**(5990):171-172.
- 446 19. Geiduschek EP, Kassavetis GA: **The RNA polymerase III transcription apparatus.**  
447 *Journal of molecular biology* 2001, **310**(1):1-26.

- 448 20. Schramm L, Hernandez N: **Recruitment of RNA polymerase III to its target**  
449 **promoters.** *Genes & development* 2002, **16**(20):2593-2620.
- 450 21. Bird AP: **DNA methylation and the frequency of CpG in animal DNA.** *Nucleic acids*  
451 *research* 1980, **8**(7):1499-1504.
- 452 22. Luo ZX, Yuan CX, Meng QJ, Ji Q: **A Jurassic eutherian mammal and divergence of**  
453 **marsupials and placentals.** *Nature* 2011, **476**(7361):442-445.
- 454 23. Casavant NC, Hardies SC: **The dynamics of murine LINE-1 subfamily amplification.**  
455 *Journal of molecular biology* 1994, **241**(3):390-397.
- 456 24. Pascale E, Liu C, Valle E, Usdin K, Furano AV: **The evolution of long interspersed**  
457 **repeated DNA (L1, LINE 1) as revealed by the analysis of an ancient rodent L1**  
458 **DNA family.** *J Mol Evol* 1993, **36**(1):9-20.
- 459 25. Adey NB, Schichman SA, Graham DK, Peterson SN, Edgell MH, Hutchison CA, 3rd:  
460 **Rodent L1 evolution has been driven by a single dominant lineage that has**  
461 **repeatedly acquired new transcriptional regulatory sequences.** *Molecular biology*  
462 *and evolution* 1994, **11**(5):778-789.
- 463 26. Clough JE, Foster JA, Barnett M, Wichman HA: **Computer simulation of transposable**  
464 **element evolution: random template and strict master models.** *J Mol Evol* 1996,  
465 **42**(1):52-58.
- 466 27. Kramerov DA, Vassetzky NS: **Short retroposons in eukaryotic genomes.** *International*  
467 *review of cytology* 2005, **247**:165-221.
- 468 28. Ogiwara I, Miya M, Ohshima K, Okada N: **Retropositional parasitism of SINEs on**  
469 **LINEs: identification of SINEs and LINEs in elasmobranchs.** *Molecular biology and*  
470 *evolution* 1999, **16**(9):1238-1250.

History of LINE and SINE extinction

- 471 29. Goodier JL, Ostertag EM, Du K, Kazazian HH, Jr.: **A novel active L1 retrotransposon**  
472 **subfamily in the mouse.** *Genome research* 2001, **11**(10):1677-1685.
- 473 30. Hedges DJ, Deininger PL: **Inviting instability: Transposable elements, double-strand**  
474 **breaks, and the maintenance of genome integrity.** *Mutation research* 2007, **616**(1-  
475 2):46-59.
- 476 31. Belancio VP, Hedges DJ, Deininger P: **Mammalian non-LTR retrotransposons: for**  
477 **better or worse, in sickness and in health.** *Genome research* 2008, **18**(3):343-358.
- 478 32. Muotri AR, Chu VT, Marchetto MC, Deng W, Moran JV, Gage FH: **Somatic mosaicism**  
479 **in neuronal precursor cells mediated by L1 retrotransposition.** *Nature* 2005,  
480 **435**(7044):903-910.
- 481 33. Coufal NG, Garcia-Perez JL, Peng GE, Yeo GW, Mu Y, Lovci MT, Morell M, O'Shea  
482 KS, Moran JV, Gage FH: **L1 retrotransposition in human neural progenitor cells.**  
483 *Nature* 2009, **460**(7259):1127-1131.
- 484 34. Chow JC, Ciaudo C, Fazzari MJ, Mise N, Servant N, Glass JL, Attreed M, Avner P,  
485 Wutz A, Barillot E *et al*: **LINE-1 activity in facultative heterochromatin formation**  
486 **during X chromosome inactivation.** *Cell* 2010, **141**(6):956-969.
- 487 35. Cantrell MA, Carstens BC, Wichman HA: **X chromosome inactivation and Xist**  
488 **evolution in a rodent lacking LINE-1 activity.** *PLoS One* 2009, **4**(7):e6252.
- 489 36. Sasaki T, Nishihara H, Hirakawa M, Fujimura K, Tanaka M, Kokubo N, Kimura-Yoshida  
490 C, Matsuo I, Sumiyama K, Saitou N *et al*: **Possible involvement of SINEs in**  
491 **mammalian-specific brain formation.** *Proc Natl Acad Sci U S A* 2008, **105**(11):4220-  
492 4225.

History of LINE and SINE extinction

- 493 37. Kunarso G, Chia NY, Jeyakani J, Hwang C, Lu X, Chan YS, Ng HH, Bourque G:  
494 **Transposable elements have rewired the core regulatory network of human**  
495 **embryonic stem cells.** *Nature genetics* 2010, **42**(7):631-634.
- 496 38. Morrish TA, Gilbert N, Myers JS, Vincent BJ, Stamato TD, Taccioli GE, Batzer MA,  
497 Moran JV: **DNA repair mediated by endonuclease-independent LINE-1**  
498 **retrotransposition.** *Nature genetics* 2002, **31**(2):159-165.
- 499 39. Carbone L, Harris RA, Mootnick AR, Milosavljevic A, Martin DI, Rocchi M, Capozzi O,  
500 Archidiacono N, Konkel MK, Walker JA *et al*: **Centromere remodeling in Hoolock**  
501 **leuconedys (Hylobatidae) by a new transposable element unique to the gibbons.**  
502 *Genome Biol Evol* 2012, **4**(7):648-658.
- 503 40. Cournac A, Koszul R, Mozziconacci J: **The 3D folding of metazoan genomes**  
504 **correlates with the association of similar repetitive elements.** *Nucleic acids research*  
505 2016, **44**(1):245-255.
- 506 41. Wissing S, Montano M, Garcia-Perez JL, Moran JV, Greene WC: **Endogenous**  
507 **APOBEC3B restricts LINE-1 retrotransposition in transformed cells and human**  
508 **embryonic stem cells.** *J Biol Chem* 2011, **286**(42):36427-36437.
- 509 42. Suzuki J, Yamaguchi K, Kajikawa M, Ichiyanagi K, Adachi N, Koyama H, Takeda S,  
510 Okada N: **Genetic evidence that the non-homologous end-joining repair pathway is**  
511 **involved in LINE retrotransposition.** *PLoS genetics* 2009, **5**(4):e1000461.
- 512 43. Gasior SL, Roy-Engel AM, Deininger PL: **ERCC1/XPF limits L1 retrotransposition.**  
513 *DNA Repair (Amst)* 2008, **7**(6):983-989.
- 514 44. Goodier JL, Cheung LE, Kazazian HH, Jr.: **MOV10 RNA helicase is a potent inhibitor**  
515 **of retrotransposition in cells.** *PLoS genetics* 2012, **8**(10):e1002941.

- 516 45. McLaughlin RN, Jr., Young JM, Yang L, Neme R, Wichman HA, Malik HS: **Positive**  
517 **selection and multiple losses of the LINE-1-derived L1TD1 gene in mammals**  
518 **suggest a dual role in genome defense and pluripotency.** *PLoS genetics* 2014,  
519 **10(9):e1004531.**
- 520 46. Dai L, Taylor MS, O'Donnell KA, Boeke JD: **Poly(A) binding protein C1 is essential**  
521 **for efficient L1 retrotransposition and affects L1 RNP formation.** *Molecular and*  
522 *cellular biology* 2012, **32(21):4323-4336.**
- 523 47. Taylor MS, LaCava J, Mita P, Molloy KR, Huang CR, Li D, Adney EM, Jiang H, Burns  
524 KH, Chait BT *et al*: **Affinity proteomics reveals human host factors implicated in**  
525 **discrete stages of LINE-1 retrotransposition.** *Cell* 2013, **155(5):1034-1048.**
- 526 48. Cordaux R, Hedges DJ, Herke SW, Batzer MA: **Estimating the retrotransposition rate**  
527 **of human Alu elements.** *Gene* 2006, **373:134-137.**
- 528 49. Huang CR, Schneider AM, Lu Y, Niranjan T, Shen P, Robinson MA, Steranka JP, Valle  
529 D, Civin CI, Wang T *et al*: **Mobile interspersed repeats are major structural variants**  
530 **in the human genome.** *Cell* 2010, **141(7):1171-1182.**
- 531 50. Yoder JA, Walsh CP, Bestor TH: **Cytosine methylation and the ecology of**  
532 **intragenomic parasites.** *Trends Genet* 1997, **13(8):335-340.**
- 533 51. Bourc'his D, Bestor TH: **Meiotic catastrophe and retrotransposon reactivation in**  
534 **male germ cells lacking Dnmt3L.** *Nature* 2004, **431(7004):96-99.**
- 535 52. Aravin AA, Sachidanandam R, Girard A, Fejes-Toth K, Hannon GJ: **Developmentally**  
536 **regulated piRNA clusters implicate MILI in transposon control.** *Science* 2007,  
537 **316(5825):744-747.**



History of LINE and SINE extinction

- 538 53. Cantrell MA, Scott L, Brown CJ, Martinez AR, Wichman HA: **Loss of LINE-1 activity**  
539 **in the megabats.** *Genetics* 2008, **178**(1):393-404.
- 540 54. Yang L, Brunfeldt J, Scott L, Wichman H: **Reviving the dead: history and reactivation**  
541 **of an extinct Ll.** *PLoS genetics* 2014, **10**(6):e1004395.
- 542 55. Casavant NC, Scott L, Cantrell MA, Wiggins LE, Baker RJ, Wichman HA: **The end of**  
543 **the LINE?: lack of recent L1 activity in a group of South American rodents.**  
544 *Genetics* 2000, **154**(4):1809-1817.
- 545 56. Grahn RA, Rinehart TA, Cantrell MA, Wichman HA: **Extinction of LINE-1 activity**  
546 **coincident with a major mammalian radiation in rodents.** *Cytogenet Genome Res*  
547 2005, **110**(1-4):407-415.
- 548 57. Rinehart TA, Grahn RA, Wichman HA: **SINE extinction preceded LINE extinction in**  
549 **sigmodontine rodents: implications for retrotranspositional dynamics and**  
550 **mechanisms.** *Cytogenet Genome Res* 2005, **110**(1-4):416-425.
- 551 58. Platt RN, 2nd, Ray DA: **A non-LTR retroelement extinction in Spermophilus**  
552 **tridecemlineatus.** *Gene* 2012, **500**(1):47-53.
- 553 59. Boissinot S, Roos C, Furano AV: **Different rates of LINE-1 (L1) retrotransposon**  
554 **amplification and evolution in New World monkeys.** *J Mol Evol* 2004, **58**(1):122-130.
- 555 60. Waters PD, Dobigny G, Pardini AT, Robinson TJ: **LINE-1 distribution in Afrotheria**  
556 **and Xenarthra: implications for understanding the evolution of LINE-1 in**  
557 **eutherian genomes.** *Chromosoma* 2004, **113**(3):137-144.
- 558 61. Gallus S, Hallstrom BM, Kumar V, Dodt WG, Janke A, Schumann GG, Nilsson MA:  
559 **Evolutionary histories of transposable elements in the genome of the largest living**

- 560           **marsupial carnivore, the Tasmanian devil.** *Molecular biology and evolution* 2015,  
561           **32(5):1268-1283.**
- 562   62.   Smith MF, Patton JL: **Phylogenetic relationships and the radiation of sigmodontine**  
563           **rodents in South America: evidence from cytochrome b.** *Journal of mammalian*  
564           *evolution* 1999, **6(2):89-128.**
- 565   63.   Wilson DE: **Mammal Species of the World: A Taxonomic and Geographic**  
566           **Reference**, vol. 2: JHU Press; 2005.
- 567   64.   Cantrell MA, Ederer MM, Erickson IK, Swier VJ, Baker RJ, Wichman HA: **MysTR: an**  
568           **endogenous retrovirus family in mammals that is undergoing recent amplifications**  
569           **to unprecedented copy numbers.** *Journal of virology* 2005, **79(23):14698-14707.**
- 570   65.   Erickson IK, Cantrell MA, Scott L, Wichman HA: **Retrofitting the genome: L1**  
571           **extinction follows endogenous retroviral expansion in a group of muroid rodents.**  
572           *Journal of virology* 2011, **85(23):12315-12323.**
- 573   66.   Cordaux R, Batzer MA: **The impact of retrotransposons on human genome evolution.**  
574           *Nat Rev Genet* 2009, **10(10):691-703.**
- 575   67.   Smit A, Hubley R: **RepeatMasker Open-3.0.** In.; 1996-2010.
- 576   68.   Schenk JJ, Rowe KC, Stepan SJ: **Ecological opportunity and incumbency in the**  
577           **diversification of repeated continental colonizations by muroid rodents.** *Systematic*  
578           *biology* 2013, **62(6):837-864.**
- 579   69.   Marshall LG, Butler RF, Drake RE, Curtis GH, Tedford RH: **Calibration of the great**  
580           **american interchange.** *Science* 1979, **204(4390):272-279.**
- 581   70.   Smit AF, Toth G, Riggs AD, Jurka J: **Ancestral, mammalian-wide subfamilies of**  
582           **LINE-1 repetitive sequences.** *Journal of molecular biology* 1995, **246(3):401-417.**

- 583 71. Khan H, Smit A, Boissinot S: **Molecular evolution and tempo of amplification of**  
584 **human LINE-1 retrotransposons since the origin of primates.** *Genome research* 2006,  
585 **16(1):78-87.**
- 586 72. Gregory TR: **Insertion-deletion biases and the evolution of genome size.** *Gene* 2004,  
587 **324:15-34.**
- 588 73. Magoc T, Salzberg SL: **FLASH: fast length adjustment of short reads to improve**  
589 **genome assemblies.** *Bioinformatics* 2011, **27(21):2957-2963.**
- 590 74. **Animal Genome Size Database.** [<http://www.genomesize.com/>]
- 591 75. Cantrell MA, Grahn RA, Scott L, Wichman HA: **Isolation of markers from recently**  
592 **transposed LINE-1 retrotransposons.** *Biotechniques* 2000, **29(6):1310-1316.**
- 593 76. Guindon S, Dufayard JF, Lefort V, Anisimova M, Hordijk W, Gascuel O: **New**  
594 **algorithms and methods to estimate maximum-likelihood phylogenies: assessing the**  
595 **performance of PhyML 3.0.** *Systematic biology* 2010, **59(3):307-321.**
- 596 77. R Core Team: **R: A Language and Environment for Statistical Computing.** In.  
597 Vienna, Austria; 2013.

598

## 599 **Figure legends**

600

601 **Figure 1. The phylogeny of the sigmodontine rodents.** The tree is based on Schenck *et*  
602 *al.* [68]. Taxa are the sampled genera in the group; tribes are indicated on the right side of the  
603 taxa. Eight of the nine tribes and 12 of the 14 sampled genera by Rinehart *et al.* [57] are shown.  
604 L1 and B1 activity of each taxon is demonstrated by gray scale and: black indicates active L1  
605 and B1, dark gray indicates active L1 and inactive B1 and medium gray indicates the taxa where

## History of LINE and SINE extinction

606 L1 activity cannot be inferred and light gray indicates the taxa where L1 can be inferred to be  
607 active. “o” corresponds to active L1 and B1 and “x” corresponds to inactive L1 and B1.

608 **Figure 2. The phylogenies of L1 and B1 families.** Panel A shows the L1 tree and B  
609 shows the B1 tree. To reflect ages of the families, the trees were based on the distance between  
610 families. The distance between any two families was calculated by taking the average pairwise  
611 distance of the consensus sequences of subfamilies that belong to each family.

612 **Figure 3. The age distribution of L1 families.** L1 families in each row are arranged in  
613 chronological order with the youngest families on the left. The species analyzed in each row is  
614 indicated at the right. Names of families are noted on the top of each panel. L1 copy number is  
615 plotted by percent divergence from the corresponding subfamily consensus in 1% windows. The  
616 age of each family is approximated by the peak of the distribution. L1 copy numbers are  
617 normalized as copies per three Gbp of MiSeq sequence which approximates the copy number per  
618 haploid genome. Panel A shows the shared families and panel B shows the *Sigmodon*-specific  
619 families.

620 **Figure 4. Comparison of L1 and B1 families spanning their extinction.** Panel A  
621 presents L1 families S5, OS1 and OS2 arranged in a chronological order with the youngest  
622 families on the left, and panel B presents B1 families OS1 and OSP1. The species analyzed in  
623 each row is indicated at the right. Names of families are noted at the top. Copy number of L1  
624 OS2 is comparable in *O. palustris* and *S. hispidus*, but more OS1 copies were detected in *O.*  
625 *palustris*. Subsequently, there was a new wave of L1 retrotransposition in *S. hispidus* (family  
626 S5), but no younger waves of L1 retrotransposition events were identified in *O. palustris*. B1  
627 OS1 corresponds to L1 OS2 in terms of age.

628 **Figure 5. The age distribution of B1 families.** B1 families in each row are arranged in  
629 chronological order with the youngest families on the left. The species analyzed in each row is  
630 indicated at the right. Names of families are noted on the top of each panel. B1 copy number is  
631 plotted by percent divergence from the corresponding subfamily consensus in 1% windows. The  
632 age of each family is approximated by the peak of the distribution. B1 copy numbers are  
633 normalized as copies per three Gbp of MiSeq sequence which approximates the copy number per  
634 haploid genome.

635

### 636 **Supporting information**

637 **Figure S1. The maximum likelihood phylogeny of detected L1 subfamilies.**

638 Reconstructed *O. palustris* and *S. hispidus* L1s, labeled ‘seed’, and *P. maniculatus* subfamilies 5  
639 and 6 are included as markers. The tree was reconstructed using PhyML [76] with the GTR+I+G  
640 model and 100 bootstrap replicates. Bootstrap values > 80% are shown.

641 **Figure S2. The age distribution of all detected L1 and B1 sequences.** Ages of  
642 sequences are approximated by their percent divergence from the corresponding subfamily  
643 consensus sequences and plotted in 1% windows. Species and retrotransposon names are  
644 indicated at the top of each panel.

645 **Table S1. The statistics and designation of L1 subfamilies and families.** “Ory” stands  
646 for *O. palustris* and “Sig” stands for *S. hispidus*. “Peak” indicates the peak of the L1 divergence  
647 distribution of the subfamily or family identified by kernel smoothing. Copy numbers are  
648 normalized as copies per three Gbp of MiSeq sequence used for the search, which approximates  
649 the copy number per haploid genome. Designation of families is only shown after the first  
650 subfamily that belongs to it; all subsequent subfamilies belong to this family until the

## History of LINE and SINE extinction

651 demarcation of the next family. Characters in family names: “S” represents *S. hispidus*-specific,  
652 “OS” for shared by *O. palustris* and *S. hispidus* and “OSP” for shared by *O. palustris*, *S. hispidus*  
653 and *P. maniculatus*. Numbers in the family names reflect their ages among the family group  
654 with “1” being the youngest. Copy numbers of families are rounded sums of subfamily copy  
655 numbers per three Gbp of sequences and, thus, are occasionally off by one.

656 **Table S2. The statistics and designation of B1 subfamilies and families.** “Ory” stands  
657 for *O. palustris* and “Sig” stands for *S. hispidus*. “Peak” indicates the peak of the B1 divergence  
658 distribution of the subfamily or family identified by kernel smoothing. Copy numbers are  
659 normalized by per three Gbp of MiSeq sequence used for the search. Designation of families is  
660 only shown after the first subfamily that belongs to it; all subsequent subfamilies belong to this  
661 family until the demarcation of the next family. Characters in family names: “OS” represents  
662 families shared by *O. palustris* and *S. hispidus* and “OSP” for families shared by *O. palustris*, *S.*  
663 *hispidus* and *P. maniculatus*. Numbers in the family names reflect their ages within the family  
664 group with “1” being the youngest. Copy numbers of families are rounded sums of subfamily  
665 copy numbers per three Gbp of sequences.

666

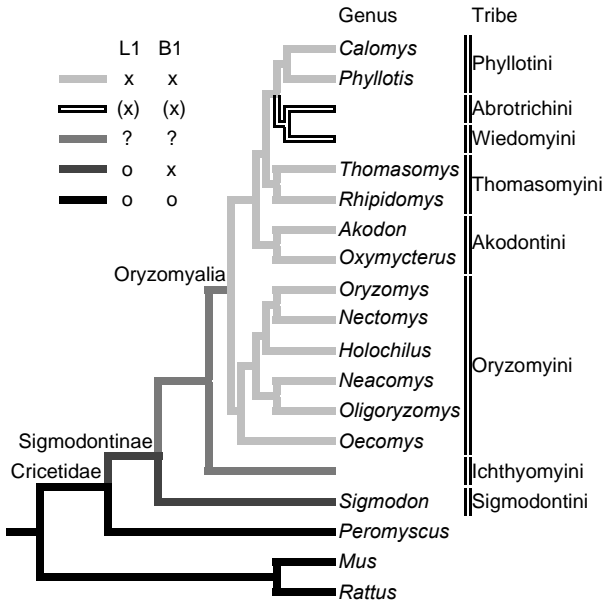

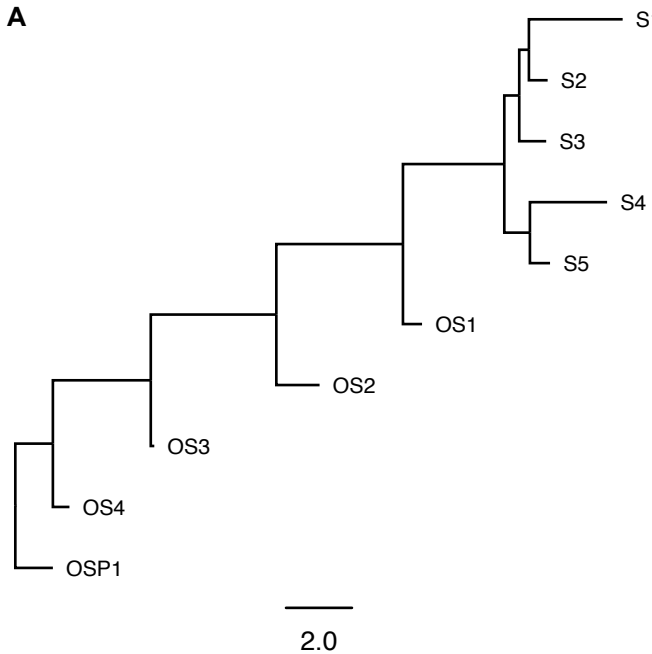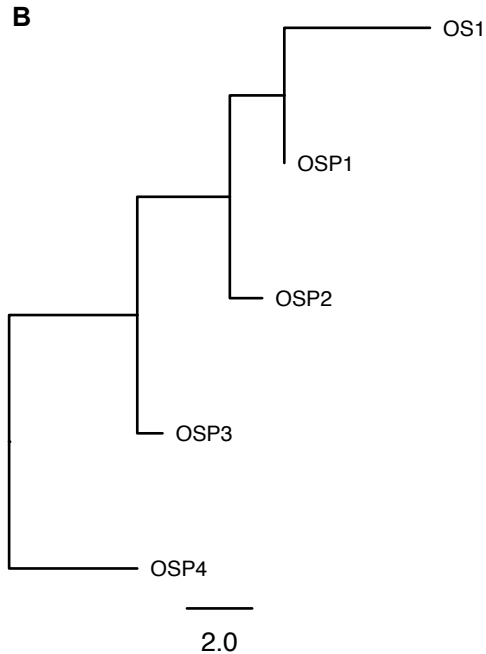



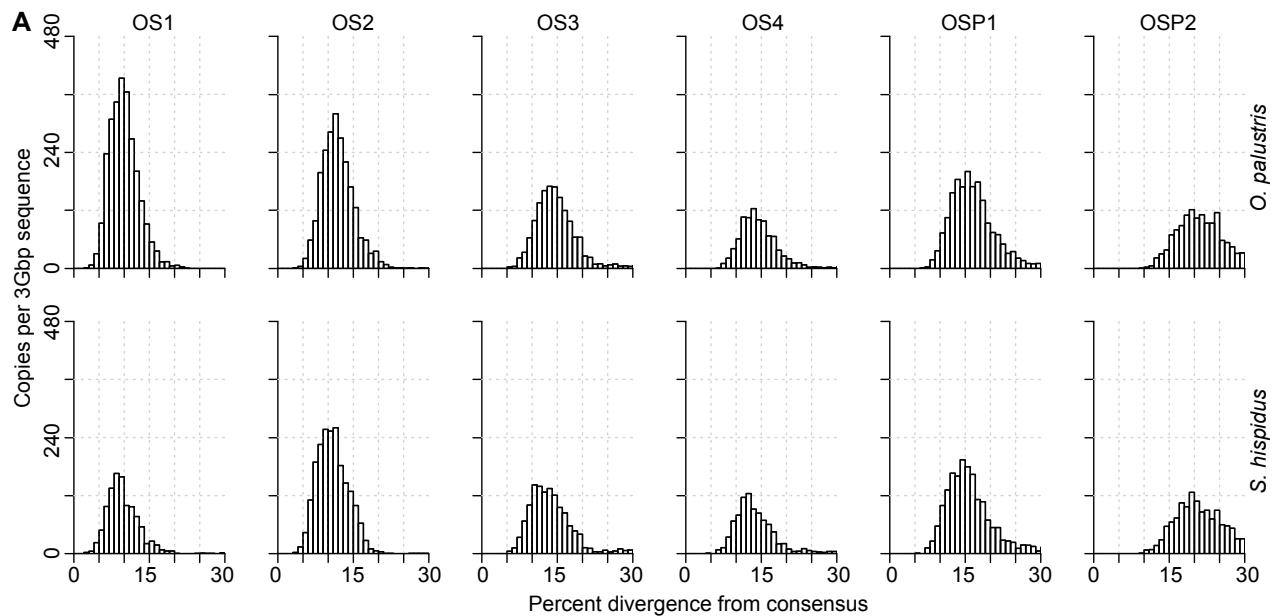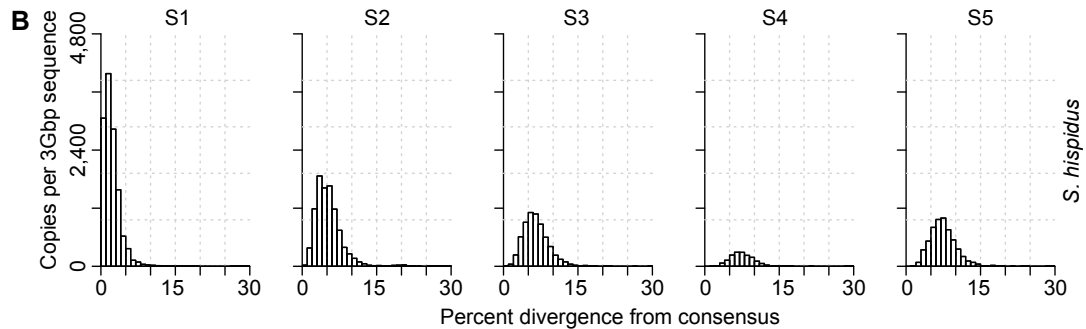

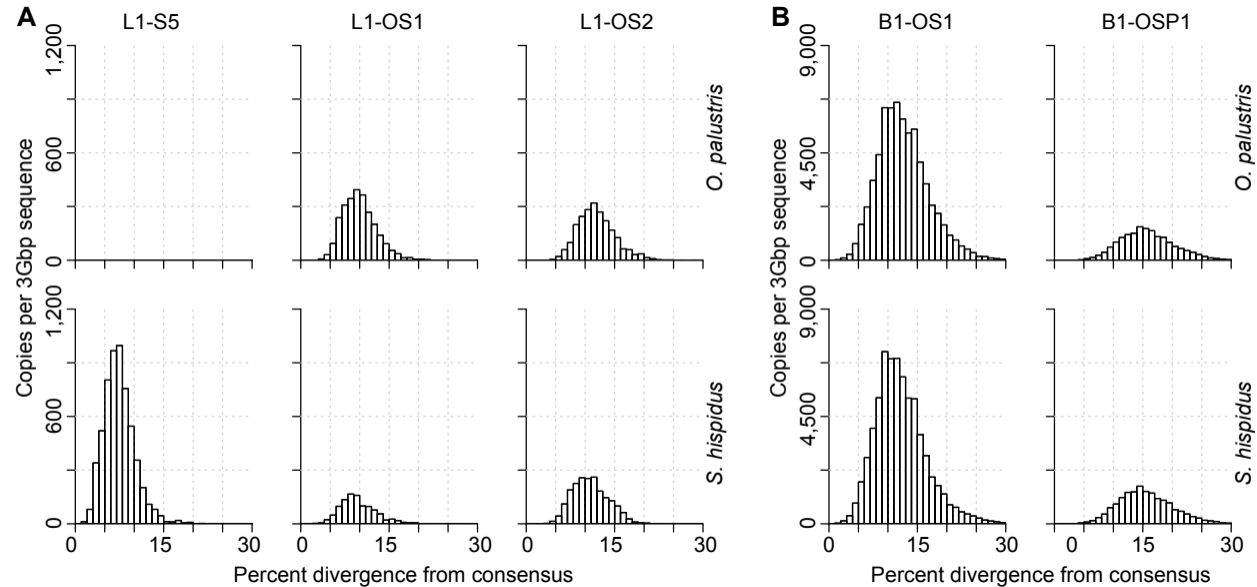

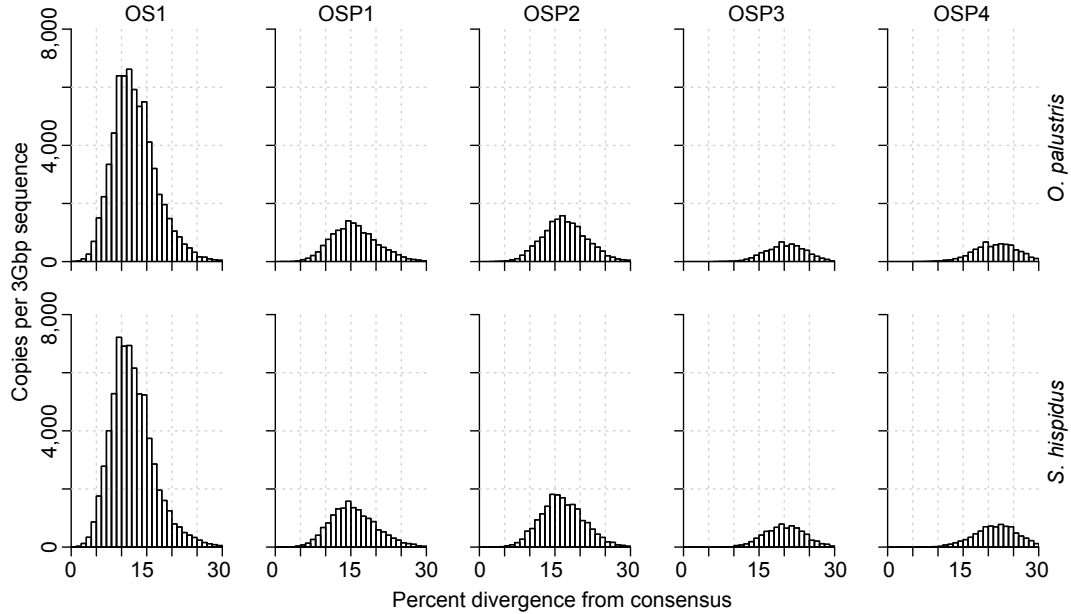

Source: https://www.biorxiv.org/content/10.1101/242636v2.full.pdf
